# Supplementary material for: Queijo Serra da Estrela PDO Cheese: Investigation into Its Morpho-Textural Traits, Microbiota, and Volatilome
Source: MDPI journal article supplement (doi:10.3390/foods12010169), 2022-12-29
Supplement: s1 [file s1]

**Table S1.** Incidence (%) of the bacterial taxonomic groups in *Queijo Serra da Estrela* PDO cheese samples according to producers.

| ASVs                                       | Producer 1 | Producer 2 | Producer 3 | Producer 4 |
|--------------------------------------------|------------|------------|------------|------------|
| <i>Acinetobacter guillouiae</i>            | 0.05912072 | 0.02799858 | 0          | 0.35507628 |
| <i>Brevibacterium</i>                      | 0.81449714 | 0.03428571 | 0          | 0.05332385 |
| <i>Carnobacterium</i>                      | 1.10235223 | 0.05799503 | 1.60816572 | 0.31531948 |
| <i>Citrobacter</i>                         | 2.92450434 | 3.22588709 | 0.088767   | 0.28541773 |
| <i>Enterobacteriaceae</i>                  | 9.06370633 | 1.60220618 | 0.16718419 | 3.036131   |
| <i>Enterococcus</i>                        | 2.03783863 | 8.73728962 | 0.50473636 | 15.8841362 |
| <i>Gluconacetobacter</i>                   | 0.31019604 | 0.26741153 | 0.0413993  | 1.27833256 |
| <i>Lactocaseibacillus casei</i> group      | 0.10084998 | 6.2180329  | 9.46629029 | 0.77385974 |
| <i>Lactiplantibacillus plantarum</i> group | 2.32547611 | 5.83007693 | 3.64423762 | 0.71128859 |
| <i>Loigolactobacillus coryniformis</i>     | 0.03408316 | 2.20222038 | 3.89658619 | 4.1640759  |
| <i>Lactococcus garvieae</i>                | 0.68768371 | 0.03942715 | 0          | 0.10520779 |
| <i>Lactococcus lactis</i>                  | 25.512839  | 30.6271133 | 25.6807807 | 2.85675322 |
| <i>Lactococcus piscium</i>                 | 5.19020265 | 2.29823174 | 36.5243568 | 42.3684758 |
| <i>Latilactobacillus sakei</i>             | 21.8930091 | 10.2205705 | 1.93135645 | 10.6894878 |
| <i>Leuconostoc lactis</i>                  | 0.10919583 | 4.21559001 | 1.14162523 | 0.03554924 |
| <i>Leuconostoc mesenteroides</i>           | 14.6505375 | 14.166486  | 4.91600955 | 10.7757522 |
| <i>Levilactobacillus brevis</i>            | 1.72119973 | 0.76083797 | 1.41310606 | 0.16243532 |
| <i>Micrococcaceae</i>                      | 0.16137021 | 0.29684933 | 0.55488868 | 0.16387524 |
| <i>Serratia</i>                            | 4.14857545 | 6.37736063 | 7.99856226 | 4.267236   |
| <i>Staphylococcus equorum</i>              | 0.18605789 | 0.24340869 | 0.20341347 | 0.44857301 |
| <i>Staphylococcus sciuri</i>               | 0          | 0.51367026 | 0          | 0          |
| <i>Streptococcus</i>                       | 5.03281336 | 0.61796662 | 0.00676682 | 0.76563629 |

ASVs, amplicon sequence variants

**Table S2.** Incidence (%) of the fungal taxonomic groups in *Queijo Serra da Estrela* PDO cheese samples according to producers.

| ASVs                                | Producer 1 | Producer 2 | Producer 3 | Producer 4 |
|-------------------------------------|------------|------------|------------|------------|
| <i>Aspergillus</i>                  | 0.0000     | 0.0085     | 1.9418     | 0.0872     |
| <i>Candida boidinii</i>             | 0.9618     | 15.4761    | 0.0000     | 0.1408     |
| <i>Candida sake</i>                 | 0.0017     | 0.2324     | 0.1378     | 0.4552     |
| <i>Cladosporium variabile</i>       | 3.0565     | 0.7017     | 3.2920     | 2.8169     |
| <i>Clavispora lusitaniae</i>        | 0.4127     | 0.2158     | 6.7394     | 1.0541     |
| <i>Cutaneotrichosporon curvatus</i> | 0.0000     | 0.0000     | 2.4974     | 1.4503     |
| <i>Debaryomyces hansenii</i>        | 51.7352    | 15.1158    | 4.1062     | 11.0923    |
| <i>Galactomyces geotrichum</i>      | 0.0000     | 30.3475    | 0.4306     | 0.0000     |
| <i>Geotrichum</i>                   | 0.9704     | 0.0000     | 0.0000     | 0.0000     |
| <i>Kurtzmaniella zeylanoides</i>    | 9.1411     | 19.6062    | 0.0000     | 0.0000     |
| <i>Lachancea thermotolerans</i>     | 0.3177     | 0.0000     | 1.9979     | 1.0039     |
| <i>Metschnikowia fructicola</i>     | 0.0000     | 0.0000     | 8.1079     | 2.2409     |
| <i>Naganishia albidosimilis</i>     | 0.0000     | 9.9964     | 0.0000     | 0.0000     |
| <i>Nakazawaea wickerhamii</i>       | 0.1815     | 0.2111     | 0.3445     | 0.3215     |
| <i>Penicillium</i>                  | 0.5776     | 2.4622     | 0.1550     | 0.0000     |
| <i>Pichia fermentans</i>            | 0.2335     | 0.1436     | 0.7234     | 4.3336     |
| <i>Protomyces inouyei</i>           | 0.0035     | 0.7666     | 5.0988     | 0.0000     |
| <i>Starmerella</i>                  | 0.0000     | 0.5422     | 17.6603    | 34.0855    |
| <i>Symbiotaphrina</i>               | 0.0350     | 0.0408     | 2.2378     | 0.7687     |
| <i>Ustilago</i>                     | 0.5346     | 0.8299     | 0.3961     | 1.2028     |
| <i>Vishniacozyma victoriae</i>      | 23.9039    | 1.0897     | 0.1895     | 2.0140     |

ASVs, amplicon sequence variants
